# Supplementary material
Source: publisher figshare collection journal article supplement (https://geolsoc.figshare.com/ndownloader/files/13459607)
Supplement: Supplementary file 1 [file 13459607]

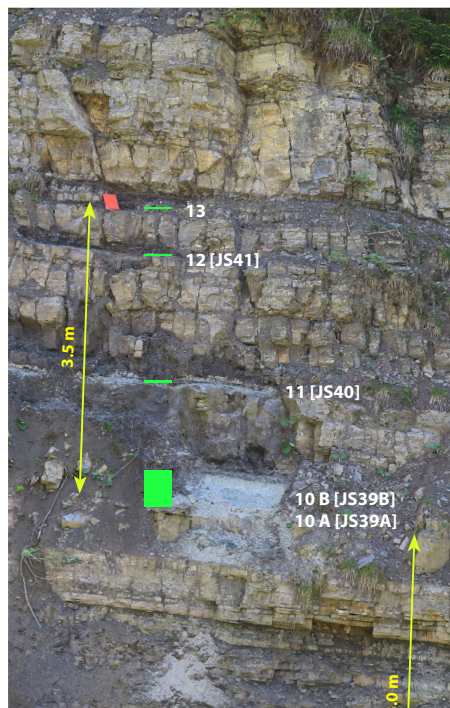

## Frommerbach east (Rio Frommer)

(WGS84: 46° 32' 16.7"N 11° 36' 28.6"E)

Bright ash layers #1 - #13 (green bars, between 1 - 40 cm thick) in interval with its base stratigraphically ca. 17 m above the top of pillow lavas (temporarily visible downstream along the same creek, around 180 m ESE of hairpin curve near Gasthof Frommer). The outcrop shown here continues upwards and largely corresponds to section P17-20 of Wierer (1997, Abb. 5 and Tab. 3a).

JS-numbers indicate sampled horizons.

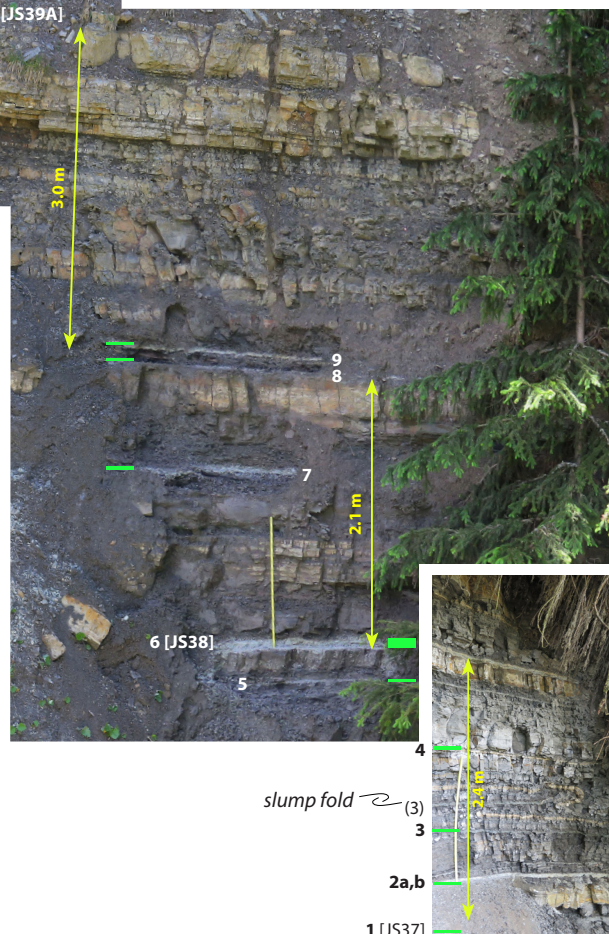

## Tschapitbach (Rio Cipit)

(WGS84: 46° 31' 4.2"N 11° 36' 9.9"E)

Ash layer (green bar)  
ca. 5 m above the top of pillow lavas  
(see Fig. 9 in Mietto et al [2012]).

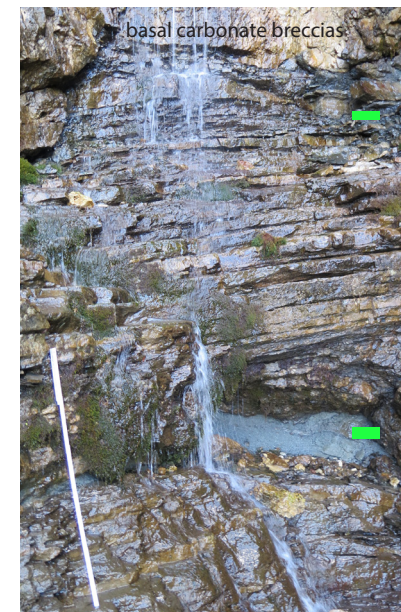

## southern tributary of uppermost Frötschbach

(section probably corresponds to  
"Rio Nigra" in Mietto et al. 2012)

(WGS84: 46° 30' 55.5"N, 11° 35' 42.1"E)

Ash layers (green bars)  
ca. 30 m above the top of pillow lavas;  
the level of the ash layer dated by Mietto et  
al (2012; Fig. 9) lies stratigraphically a few  
metres below the interval shown here.

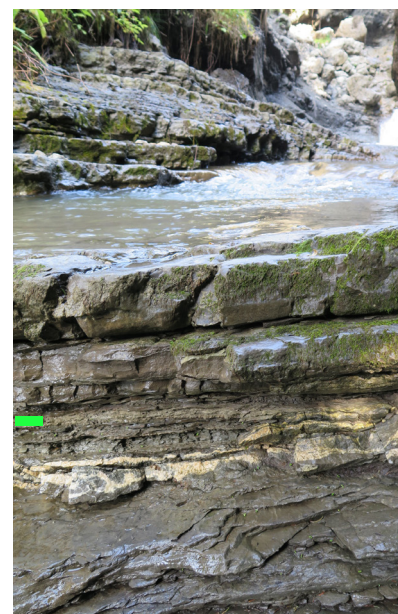

Ash layers in exposures of the  
lowermost clastic sediments  
on top of thick extrusive ba-  
salt in the area of Seiser Alm.
